# Supplementary material for: Engineering waxy corn flour with sodium fatty acids: structural modifications and implications for diabetes management
Source: Royal Society of Chemistry journal article supplement (doi:10.1039/d4fo05114a), 2025-01-01
Supplement: d4fo05114a1.pdf [file d4fo05114a1.pdf]

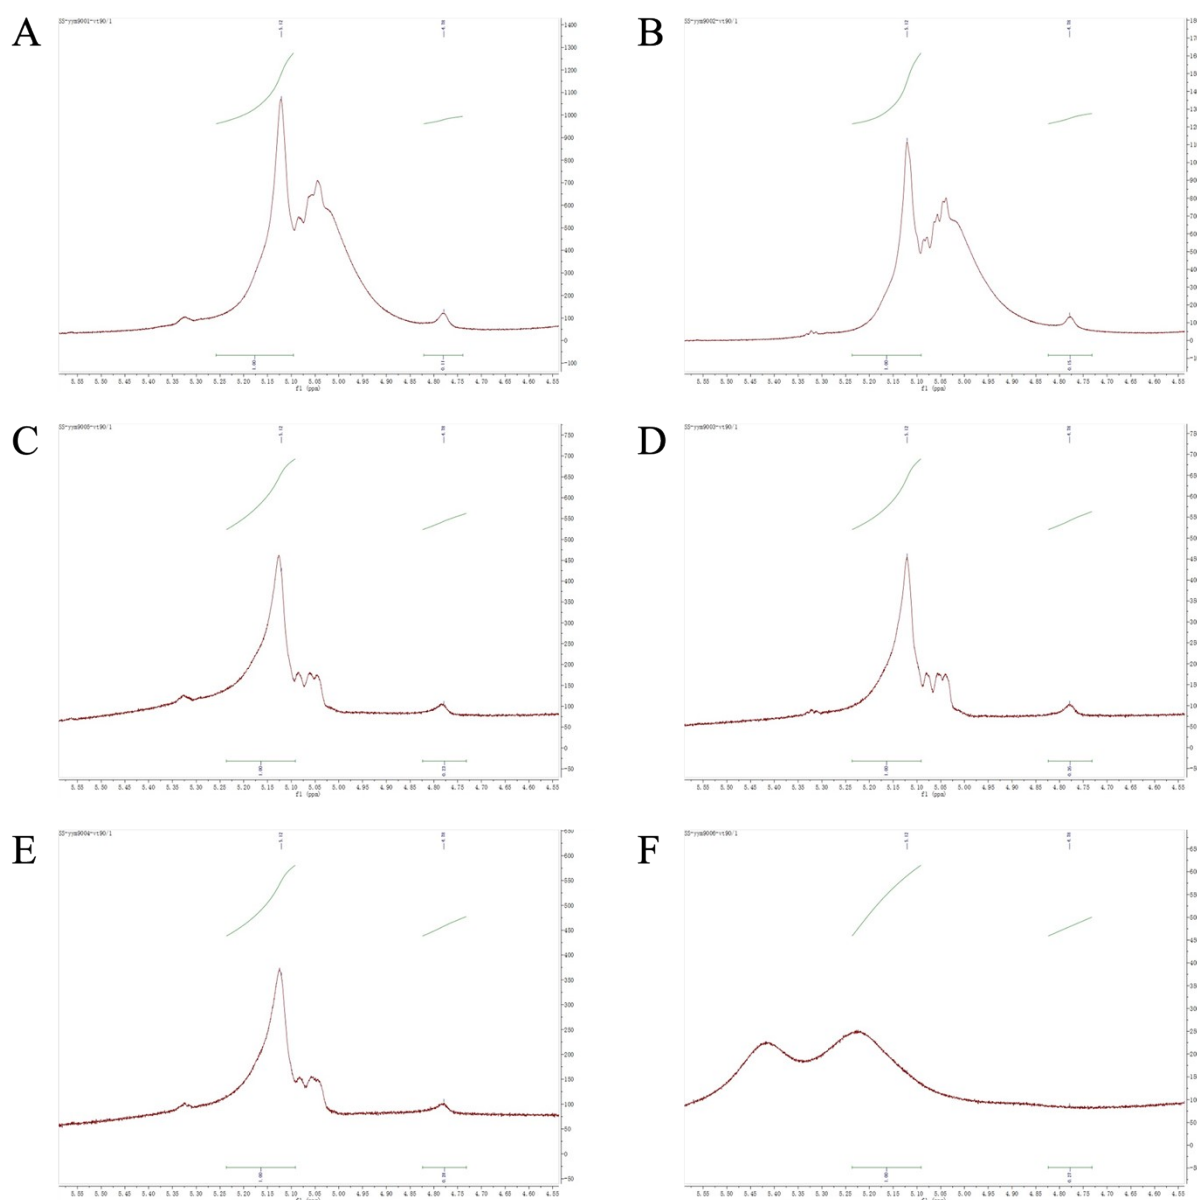

**Fig. S1** The  $^1\text{H}$ - NMR spectra of the tested samples. WC (A); GWC (B); WCC (C); WCD (D); WCM (E); WCO (F). WC, waxy corn flour; WCC, WC modified by sodium caproate (C6); WCD, WC modified by sodium decanoate (C10); WCM, WC modified by sodium myristate (C14); WCO, WC modified by sodium oleate (C18).
